# Supplementary material
Source: Springer Nature journal article supplement (https://www.springermedizin.de/resource/supplementary/12955_2007_387_MOESM2_ESM.pdf/9560294)

● Role Prevention, Placebo    ■ Role Prevention, TPM 100 mg/d

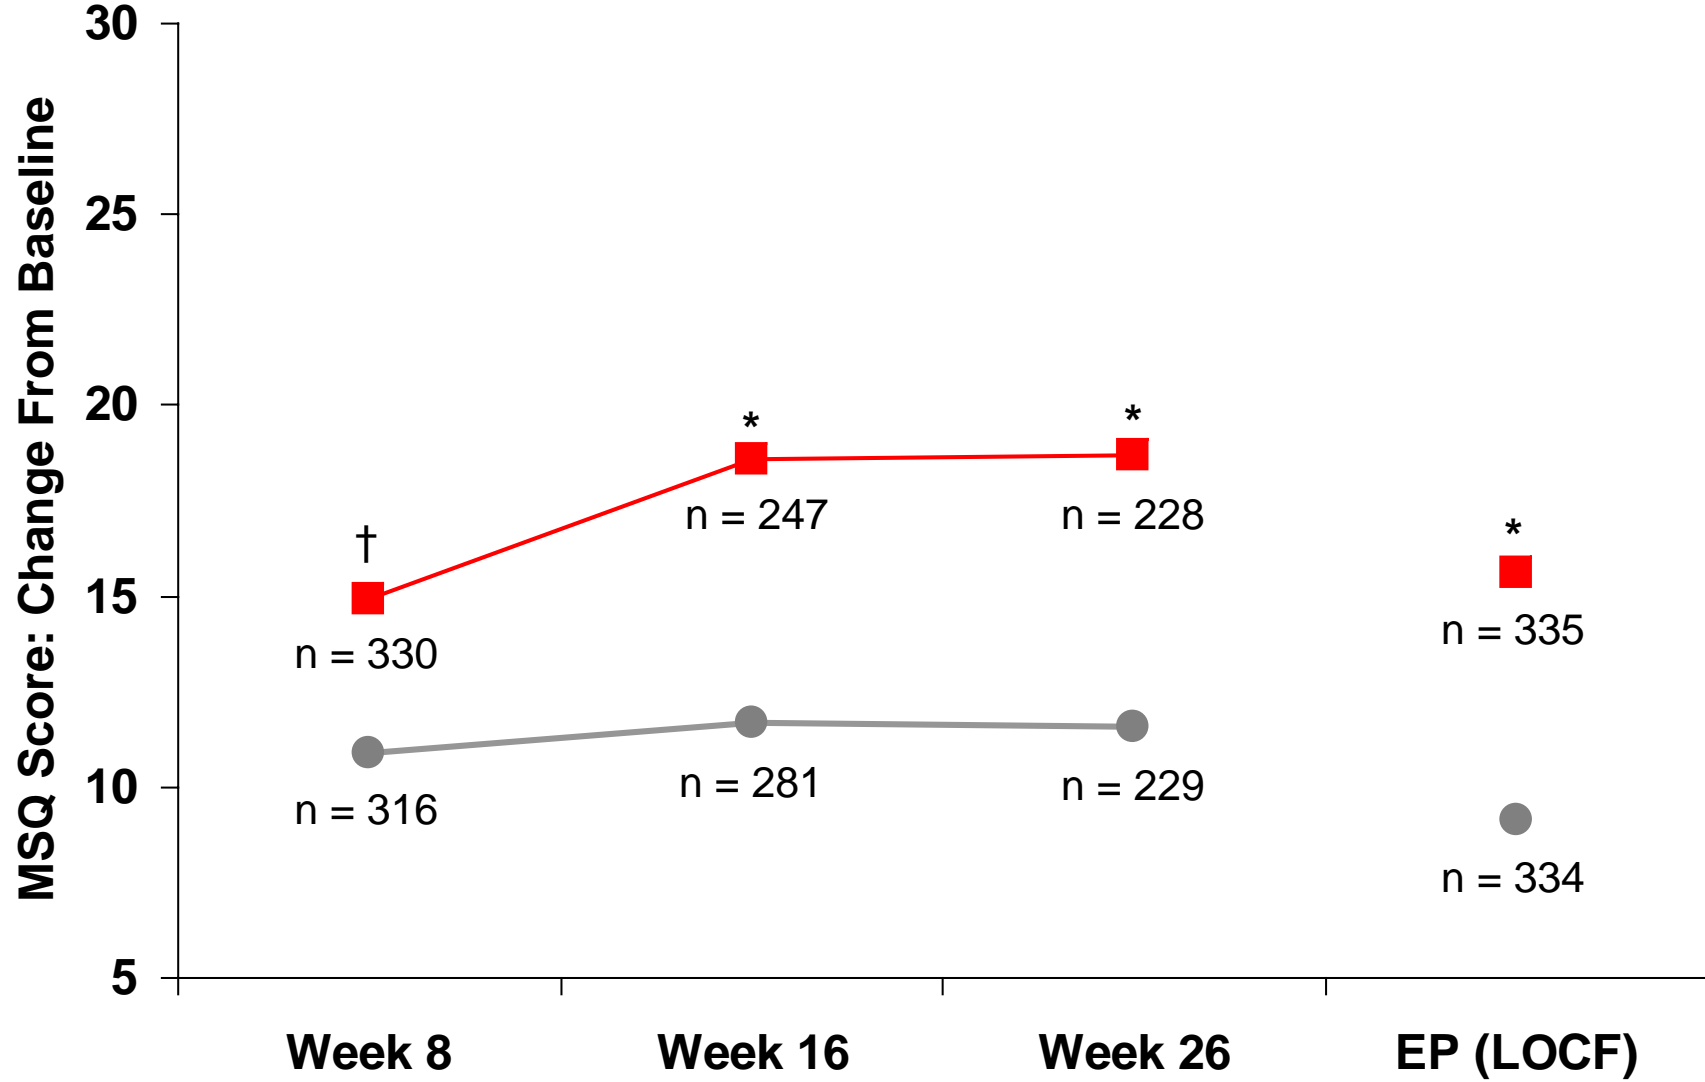

Supplement: MOESM2 [file 9560294]
